# Supplementary material for: How membrane permeation is affected by donor delivery solvent
Source: Royal Society of Chemistry journal article supplement (doi:10.1039/c2cp42747h), 2012-01-01

## How membrane permeation is affected by donor delivery solvent

Bernard P. Binks, Paul D.I. Fletcher\* and Andrew J. Johnson  
*Surfactant & Colloid Group, Department of Chemistry,  
University of Hull, Hull HU6 7RX, UK.*

Russell P. Elliott  
*GlaxoSmithKline, Harmire Road, Barnard Castle, County Durham DL12 8DT, UK*

### Supplementary Information

Figure S1. Calibration plot of absorbance versus caffeine concentration in PBS at 32°C.

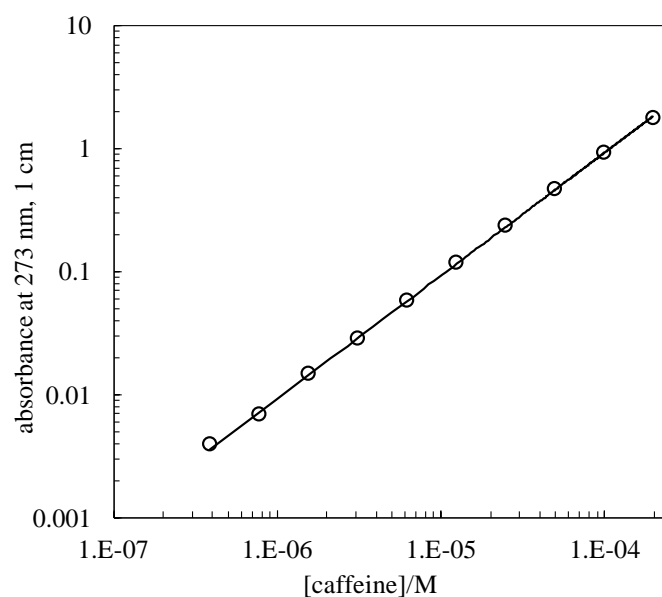

Figure S2. Calibration plot of absorbance versus caffeine concentration in squalane at 32°C.

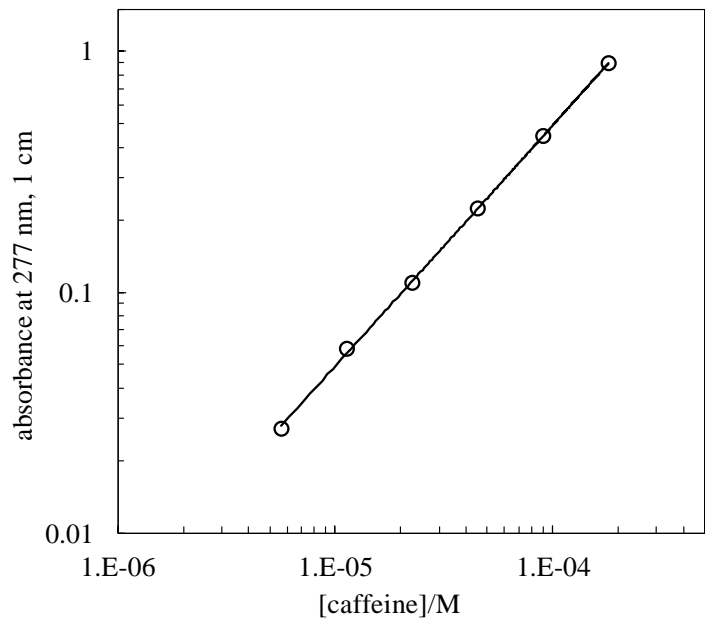

Figure S3. Calibration plot of absorbance versus testosterone concentration in PBS at 32°C.

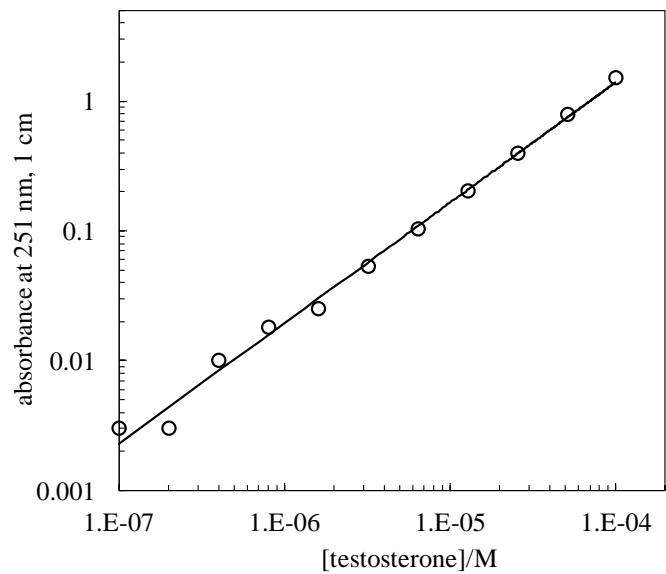

Supplement: c2cp42747h.pdf [file c2cp42747h.pdf]
